# Supplementary material for: Type 2 diabetes as a determinant of Parkinson’s disease risk and progression
Source: medRxiv preprint, doi:10.1101/2020.11.12.20230474, version 1 (2020-11-13)

Supplementary Figure 2: PD risk decreases as average age of participants increases in T2DM-specific cohort studies.


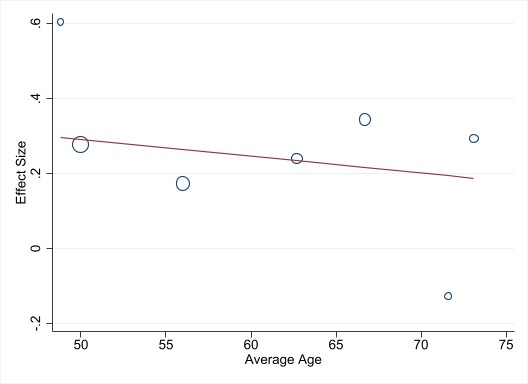

Supplement: Supplementary figure 2 [file 230474_file10.docx]
