# Supplementary material for: Type 2 diabetes as a determinant of Parkinson’s disease risk and progression
Source: medRxiv preprint, doi:10.1101/2020.11.12.20230474, version 1 (2020-11-13)

Supplementary figure 7: PD risk increases as average age of participants increases in case-control studies (any diabetes).


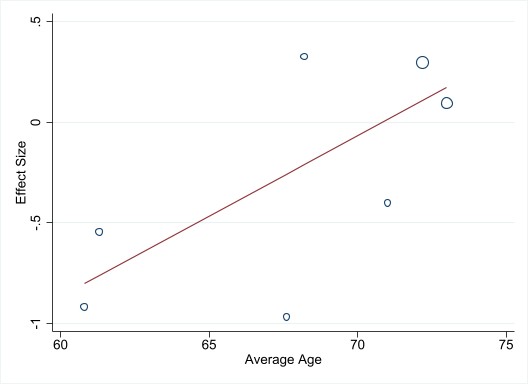

Supplement: Supplementary figure 7 [file 230474_file15.docx]
